# Supplementary material for: Heavy Metals in Soil and Sand from Playgrounds of Çanakkale City (Turkey), and Related Health Risks for Children
Source: MDPI journal article supplement (doi:10.3390/su14031145), 2022-01-20
Supplement: s1 [file s1]

# Heavy metals in soil and sand from playgrounds of Çanakkale city (Turkey), and related health risks for children

Mehmet Parlak<sup>1</sup>, Tülay Tunçay<sup>2</sup>, Fotini Botsou<sup>3</sup>

<sup>1</sup>Çanakkale Onsekiz Mart University, Lapseki Vocational School, 17800 Çanakkale, Turkey.

<sup>2</sup>Soil Fertilizer and Water Resources Central Research Institute, Ankara, Turkey.

<sup>3</sup>Laboratory of Environmental Chemistry, Department of Chemistry, National and Kapodistrian University of Athens, 15784, Athens, Greece.

## Supplementary Materials

### Health risk assessment model

The average daily dose (ADD) of heavy metals through ingestion, inhalation and dermal contact of soil and sand was calculated using equations (1)–(3) [1–4]:

$$ADD_{\text{ingestion}} = C \times \frac{IngR \times EF \times F \times ED}{BW \times AT} \times CF \quad (1)$$

$$ADD_{\text{inhalation}} = C \times \frac{InhR \times EF \times F \times ED}{PEF \times BW \times AT} \quad (2)$$

$$ADD_{\text{dermal}} = C \times \frac{SA \times AF \times ABS \times EF \times F \times ED}{BW \times AT} \times CF \quad (3)$$

where, C represents heavy metal contents (mg kg<sup>-1</sup>) of soil and sand determined in this study; IngR is the ingestion rate set at the conservative value of 200 mg d<sup>-1</sup> [5]; InhR is the inhalation rate set at InhR is the inhalation rate set at 8 m<sup>3</sup> day<sup>-1</sup> for children [3]; SA is the skin surface available for exposure, 2800 cm<sup>2</sup> for children [6]; AF is the skin adherence factor, set at 0.2 mg cm<sup>-2</sup> [6]; ABS is the dermal absorption factor (unitless), set at 0.001 [7,8]; EF is the exposure frequency (days year<sup>-1</sup>), calculated in this study by following the rationale described in [7,8] as 204 days year<sup>-1</sup> (assuming the conservative number of visits in a playground 7 days per week and subtracting 86 rainy days per year for the city and 30 days per year spent away from home); F is the fraction of time spent in a playground and set in this study at 0.1 (assuming the upper 95th percentile proposed by De Miguel et al. [7]; ED is the exposure duration, set in this study at 6 years for children [2]; ED is the exposure duration set at 6 years; CF is the conversion factor (10<sup>-6</sup> kg mg<sup>-1</sup>); BW is the average body weight at 15 kg [3]; AT is the averaging time, which equals ED x 365 days for non-carcinogenic effects [2];

PEF is the soil to air particle emission factor, in this study,  $6.8 \times 10^8 \text{ m}^3 \text{ kg}^{-1}$ , assuming absence of vegetative cover [7–9].

## Tables

Table S1. Sampling sites and traffic density around the studied playgrounds.

| Sample code | Sample site/ Playground  | Coordinates |             | Traffic density* |
|-------------|--------------------------|-------------|-------------|------------------|
|             |                          | N           | E           |                  |
| S1          | Ugur Mumcu               | 40°9'32''   | 26 °25'1''  | Medium           |
| S2          | Esenler                  | 40°9'44''   | 26 °25'5''  | Medium           |
| S3          | Rotary                   | 40°9'32''   | 26 °25'8''  | Medium           |
| S4          | Esenkent Site            | 40°9'34''   | 26 °25'17'' | Medium           |
| S5          | Ozlem Kayalı             | 40°9'48''   | 26 °25'20'' | Low              |
| S6          | Esenler Sosyal Yasam Evi | 40°9'53''   | 26 °24'51'' | Medium           |
| S7          | Ozgurluk                 | 40°9'45''   | 26 °24'29'' | High             |
| S8          | Anafartalar              | 40°9'40''   | 26 °24'43'' | Medium           |
| S9          | Can Dostlar              | 40°8'14''   | 26 °24'59'' | Low              |
| S10         | Ahmet Taner Kışlalı      | 40°8'13''   | 26 °24'47'' | High             |
| S11         | Cevatpasa                | 40°9'17''   | 26 °24'35'' | Medium           |
| S12         | Halk Bahcesi             | 40°9'3''    | 26 °24'27'' | High             |
| S13         | Eminkent                 | 40°7'13''   | 26 °24'51'' | High             |
| S14         | Resat Tabak              | 40°8'40''   | 26 °24'57'' | Low              |

\*Observations on traffic density on the roads around playgrounds were made for at least three hours per day, during three days per week (Monday, Thursday, and Friday) [10].

**Table S2.** Comparison of the certified and the measured values ( $\text{mg kg}^{-1}$ ) for the soil (NIM-GBW07425) standard reference material (Mean  $\pm$  Std. deviation;  $n = 3$ )

| Metals | Certified values | Measured values | Recovery (%) |
|--------|------------------|-----------------|--------------|
| Fe     | 42100 $\pm$ 600  | 39327 $\pm$ 840 | 107 $\pm$ 2  |
| Cr     | 59.0 $\pm$ 3.0   | 59.0 $\pm$ 8.9  | 101 $\pm$ 14 |
| Cu     | 21.4 $\pm$ 1.2   | 22.3 $\pm$ 2.5  | 97 $\pm$ 11  |
| Mn     | 572 $\pm$ 14     | 548 $\pm$ 38    | 105 $\pm$ 7  |
| Ni     | 25.4 $\pm$ 1.3   | 25.8 $\pm$ 0.7  | 98 $\pm$ 3   |
| Pb     | 24.7 $\pm$ 1.4   | 25.3 $\pm$ 1.2  | 98 $\pm$ 5   |
| Zn     | 65.0 $\pm$ 5.1   | 66.7 $\pm$ 5.9  | 98 $\pm$ 9   |

**Table S3.** Reference doses (RfDs) for ingestion (ing), inhalation (inh), and dermal contact (derm) of heavy metals ([7,8] and references therein)

| Heavy metals | RfD ing<br>( $\text{mg kg}^{-1} \text{ d}^{-1}$ ) | RfD inh<br>( $\text{mg kg}^{-1} \text{ d}^{-1}$ ) | RfD derm<br>( $\text{mg kg}^{-1} \text{ d}^{-1}$ ) |
|--------------|---------------------------------------------------|---------------------------------------------------|----------------------------------------------------|
| Cr           | 3.00E-03                                          | 2.86E-05                                          | 7.50E-05                                           |
| Cu           | 4.00E-02                                          | n.a.                                              | 2.40E-02                                           |
| Mn           | 4.60E-02                                          | 1.43E-05                                          | 1.84E-03                                           |
| Ni           | 2.00E-02                                          | 2.60E-05                                          | 8.00E-04                                           |
| Pb           | 3.50E-03                                          | 1.00E-03                                          | 5.30E-04                                           |
| Zn           | 3.00E-01                                          | n.a.                                              | 6.00E-02                                           |

n.a.: not available

**Table S4.** Pearson correlation coefficient between physicochemical properties of soils and heavy metals contents

| Parameters        | Clay   | Silt   | Fine sand | Coarse sand | pH     | EC     | CaCO <sub>3</sub> | SOM   | Cu    | Mn    | Zn    | Cr     | Ni   |
|-------------------|--------|--------|-----------|-------------|--------|--------|-------------------|-------|-------|-------|-------|--------|------|
| Silt              | 0.15   |        |           |             |        |        |                   |       |       |       |       |        |      |
| Fine sand         | -0.71* | -0.66* |           |             |        |        |                   |       |       |       |       |        |      |
| Coarse sand       | 0.13   | 0.30   | -0.63*    |             |        |        |                   |       |       |       |       |        |      |
| pH                | 0.04   | 0.22   | -0.19     | 0.15        |        |        |                   |       |       |       |       |        |      |
| EC                | 0.41*  | 0.33*  | -0.40*    | 0.04        | -0.39* |        |                   |       |       |       |       |        |      |
| CaCO <sub>3</sub> | -0.18  | -0.15  | 0.31*     | -0.33*      | 0.18   | -0.36* |                   |       |       |       |       |        |      |
| SOM               | -0.17  | -0.33  | 0.32*     | -0.15       | -0.54* | 0.36*  | 0.03              |       |       |       |       |        |      |
| Cu                | -0.28  | -0.10  | 0.07      | 0.32*       | -0.14  | -0.15  | 0.17              | 0.17  |       |       |       |        |      |
| Mn                | 0.13   | 0.29   | -0.38*    | 0.37*       | 0.04   | 0.05   | -0.34*            | -0.30 | 0.07  |       |       |        |      |
| Zn                | -0.27  | 0.17   | -0.06     | 0.29        | -0.21  | 0.02   | -0.32*            | 0.06  | 0.21  | 0.71* |       |        |      |
| Cr                | -0.26  | 0.12   | 0.17      | -0.10       | -0.09  | -0.20  | 0.01              | -0.25 | -0.06 | 0.44* | 0.55* |        |      |
| Ni                | -0.25  | -0.03  | 0.28      | -0.25       | -0.06  | -0.22  | 0.12              | 0.17  | -0.09 | 0.40* | 0.46* | 0.91** |      |
| Pb                | -0.06  | 0.18   | -0.19     | 0.30        | -0.11  | 0.08   | -0.28             | -0.12 | 0.15  | 0.69* | 0.65* | 0.27   | 0.25 |

EC: electrical conductivity, SOM: soil organic matter

\*p < 0.05; \*\*p < 0.01

## Figures

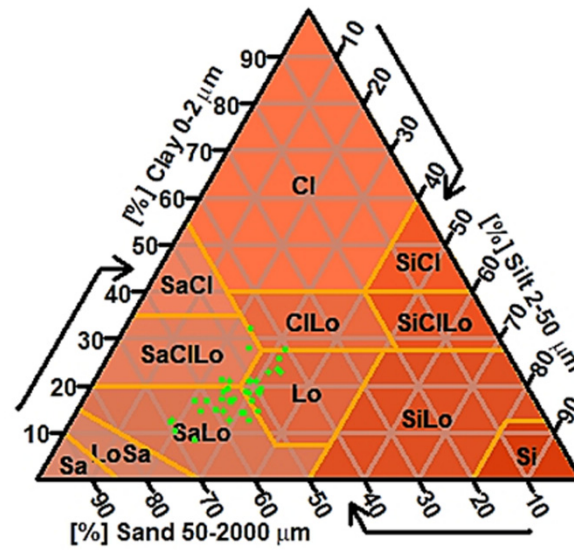

**Figure S1.** Ternary diagram of soil classification scheme (after applying the USDA soil texture tool of ref. [11]).

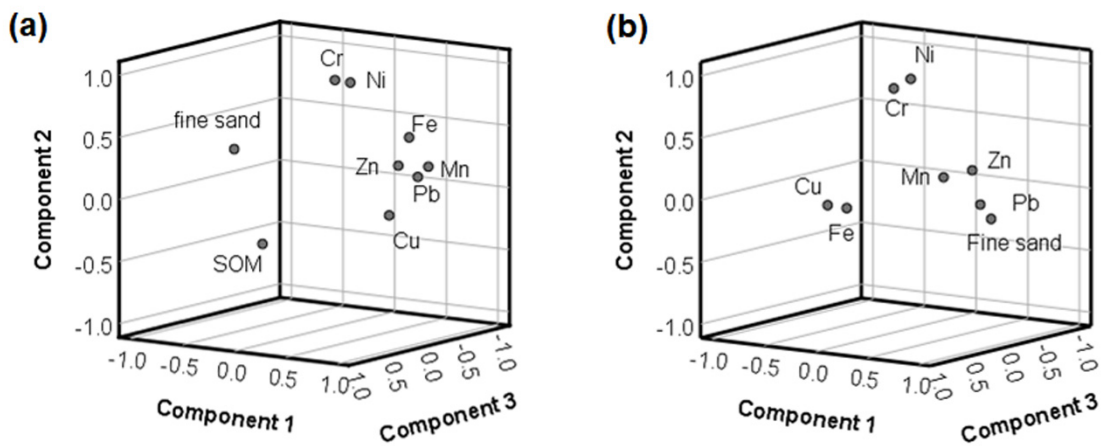

**Figure S2.** Component plots on rotated space after Factor Analysis of (a) the soil and (b) the sand samples.

## References

1. U.S. EPA. Superfund Public Health Evaluation Manual, EPA 540/1-86-060, OSWER 9285.4-1. U.S. Environmental Protection Agency Washington, DC, U.S.A., 1986.
2. U.S. EPA. Risk Assessment Guidance for Superfund, Volume I, Human Health Evaluation Manual (Part A), Interim Report, EPA/540/1-89/002. U.S. Environmental Protection Agency, Washington, DC, U.S.A., 1989.
3. U.S. EPA. Exposure Factors Handbook 2011 Edition (Final Report), EPA/600/R-09/052F. U.S. Environmental Protection Agency, Washington, DC, U.S.A., 2011.
4. U.S. EPA. Regional Screening Levels. 2019. Available online: <https://www.epa.gov/risk/regional-screening-levels-rsls-generic-tables> (assessed on 19/01/2020).
5. U.S. EPA. Exposure Factors Handbook, EPA/600/P-95/002F a-c. U.S. Environmental Protection Agency, Washington, DC, U.S.A., 1997.
6. U.S. EPA. Risk Assessment Guidance for Superfund Volume I: Human Health Evaluation Manual (Part E, Supplemental Guidance for Dermal Risk Assessment) Final, EPA/540/R/99/005, OSWER 9285.7-02EP PB99-963312. U.S. Environmental Protection Agency, Washington, DC, U.S.A; 2004.
7. De Miguel E, Iribarren I, Chacón E, Ordoñez A, Charlesworth S. Risk-based evaluation of the exposure of children to trace elements in playgrounds in Madrid (Spain). *Chemosphere*, **2007** 66(3), 505–13. DOI: 10.1016/j.chemosphere.2006.05.065.
8. Botsou F, Moutafis I, Dalaina S, Kelepertzis E. Settled bus dust as a proxy of traffic-related emissions and health implications of exposures to potentially harmful elements. *Atmos Pollut Res*, **2020**, DOI: 10.1016/j.apr.2020.07.010.
9. Guney M, Zagury GJ, Dogan N, Onay TT. Exposure assessment and risk characterization from trace elements following soil ingestion by children exposed to playgrounds, parks and picnic areas. *J Hazard Mater.*, **2010**, 182(1), 656–64, DOI: 10.1016/j.jhazmat.2010.06.082.
10. Highway traffic regulation, Available online: <https://www.kgm.gov.tr> (assessed on 8/01/2021).
11. USDA. United States Department of Agriculture, Natural Resources Conservation Service, Soil. Available online: [https://www.nrcs.usda.gov/wps/portal/nrcs/detail/soils/survey/?cid=nrcs142p2\\_054167](https://www.nrcs.usda.gov/wps/portal/nrcs/detail/soils/survey/?cid=nrcs142p2_054167) (assessed on 11/01/2022)
