# Supplementary material for: Heavy Metals in Soil and Sand from Playgrounds of Çanakkale City (Turkey), and Related Health Risks for Children
Source: MDPI journal article supplement (doi:10.3390/su14031145), 2022-01-20
Supplement: s1 [file s1]

Archive with 1 entries (1 files):
- sustainability-1540064-supplementary.pdf
